# Supplementary material for: Environmental and Clinical Strains of Vibrio cholerae Non-O1, Non-O139 From Germany Possess Similar Virulence Gene Profiles
Source: Front Microbiol. 2019 Apr 12;10:733. doi: 10.3389/fmicb.2019.00733 (PMC6474259; doi:10.3389/fmicb.2019.00733)
Supplement: Supplementary file 9 [file Table_9.xlsx]

## Sheet: WGS data
Feature	VN-00168	VN-00297	VN-00298	VN-00300	VN-00307	VN-00459	VN-00461	VN-00462	VN-00470	VN-00471	VN-00472	VN-00473	VN-00533	VN-00534	VN-02808	VN-02825	VN-02923	VN-05176	VN-10012	VN-10133	VN-10143	VN-10191
Genome size (bp)	3,937,768	3,993,497	3,948,439	3,991,019	4,001,827	4,022,959	3,988,059	4,001,187	3,915,453	4,018,284	4,038,763	3,972,012	4,113,582	3,994,436	4,120,885	4,169,797	4,197,410	3,996,050	4,023,848	3,957,761	4,079,076	4,077,978
GC content (%)	47.29	47.27	47.28	47.21	47.29	47.43	47.25	47.19	47.37	47.18	47.18	47.24	47.08	47.51	47.59	47.48	46.51	47.24	47.28	47.63	47.17	47.18
ORF GC content (%)	47.5+3.9	44.8+13.2	44.3+14.2	47.6+6.2	45.6+10.0	47.3+5.1	47.2+5.1	46.9+7.6	47.3+5.1	47.3+5.1	47.3+5.1	47.3+5.1	47.0+6.2	47.42	47.3+5.1	47.3+5.1	47.3+5.1	47.3+5.1	48.4+7.4	47.3+5.1	47.3+5.1	47.3+5.1
Genes (total)*	3.899	3.993	3.81	3.817	3.955	3.821	3.968	3.916	3.767	3.868	3.948	3.923	4.006	3.919	3.934	3.921	4.04	3.908	3.856	3.854	3.887	3.878
Genes (coding)	3.787	3.878	3.699	3.704	3.838	3.638	3.849	3.797	3.651	3.752	3.827	3.804	3.895	3.707	3.545	3.608	3.65	3.788	3.617	3.65	3.767	3.761
CDS (total)**	3.645	3.73	3.567	3.606	3.703	3.707	3.711	3.694	3.547	3.644	3.715	3.682	3.767	3.803	3.813	3.803	3.92	3.683	3.745	3.74	3.604	3.592
CDS (coding)	3.645	3.73	3.567	3.606	3.703	3.638	3.711	3.694	3.547	3.644	3.715	3.682	3.767	3.707	3.545	3.608	3.65	3.683	3.617	3.65	3.604	3.592
RNA genes (total)***	112	115	111	113	117	114	119	119	116	116	121	119	111	116	121	118	120	120	111	114	120	117
rRNAs (total) 5S, 16S, 23S***	8, 4, 7	9, 9, 4	7, 8, 4	6, 8, 4	9, 9, 5	7, 9, 3	7, 10, 6	10, 7, 7	6, 10, 4	8, 8, 6	10, 8, 8	9, 9, 6	9, 3, 3	8, 3, 8	10, 12, 7	10, 12, 4	10, 11, 7	9, 8, 7	5, 7, 5	7, 10, 4	8, 9, 8	8, 8, 7
complete rRNAs	8, 1, 1	9, 0, 1	7, 1, 1	6, 1, 0	9, 0, 1	7, 1, 1	7, 1, 1	10, 0, 1	6, 1, 1	8, 0, 1	10, 0, 0	9, 1, 1	9, 1, 1	8, 0, 0	10, 0, 1	10, 0, 1	10, 0, 1	9, 0, 1	5, 1, 0	7, 1, 1	8, 1, 1	8, 1, 1
partial rRNAs	0, 3, 6	0, 9, 3	0, 7, 3	0, 7, 4	0, 9, 4	0, 8, 2	0, 9, 5	0, 7, 6	0, 9, 3	0, 8, 5	0, 8, 8	0, 8, 5	0, 2, 2	0, 3, 8	0, 12, 6	0, 12, 3	0, 11, 6	0, 8, 6	0, 6, 5	0, 9, 3	0, 8, 7	0, 7, 6
tRNAs	89	89	88	91	90	91	92	91	92	91	91	91	92	93	88	88	88	92	90	89	90	89
ncRNAs	4	4	4	4	4	4	4	4	4	3	4	4	4	4	4	4	4	4	4	4	5	5
Pseudo Genes (total)	142	148	132	98	135	69	138	103	104	108	112	122	128	96	268	195	270	105	128	90	163	169
ambiguous residues	0	0	0	0	0	0	0	0	0	0	0	0	0	0	0	0	0	0	0	0	0	0
frameshifted	73	76	60	49	69	37	73	58	59	60	64	62	73	48	39	37	40	60	71	47	56	55
incomplete	27	33	33	30	31	23	30	17	27	19	19	27	38	35	220	144	221	18	47	30	98	107
internal stop	56	54	52	29	50	28	51	40	31	41	44	46	38	23	20	25	22	40	37	25	25	25
multiple problems	13	14	12	9	14	15	15	11	12	11	14	12	17	9	11	11	13	12	24	10	14	15
CRISPR Arrays	0	0	0	0	0	0	0	0	0	0	0	0	0	1	0	0	0	0	0	1	0	0
Predicted prophages (no.)	2	3	1	1	1	3	1	1	1	1	1	1	1	1	5	2	5	2	0	1	6	5
intact	n.d.	n.d.	n.d.	1	1	1	1	n.d.	1	n.d.	n.d.	n.d.	1	0	2	0	1	n.d.	n.d.	0	3	2
incomplete	2	3	1	n.d.	n.d.	1	n.d.	n.d.	n.d.	n.d.	n.d.	n.d.	n.d.	1	3	1	4	2	n.d.	1	2	3
questionable	n.d.	n.d.	n.d.	n.d.	n.d.	1	n.d.	1	n.d.	1	1	1	n.d.	0	0	1	0	n.d.	n.d.	0	1	n.d.
Plasmids	n.d.	n.d.	n.d.	n.d.	n.d.	n.d.	n.d.	n.d.	n.d.	n.d.	n.d.	n.d.	n.d.	n.d.	n.d.	n.d.	n.d.	n.d.	n.d.	n.d.	n.d.	n.d.
GenBank accession
Bioproject no.	PRJNA378295	PRJNA378293	PRJNA378292	PRJNA378290	PRJNA378288	PRJNA489145	PRJNA378285	PRJNA378284	PRJNA378282	PRJNA378281	PRJNA378280	PRJNA378279	PRJNA378296	PRJNA436255	PRJNA331077	PRJNA331078	PRJNA331079	PRJNA378274	PRJNA384852	PRJNA489146	PRJNA378272	PRJNA378270
Biosample no.	SAMN06484415	SAMN06484417	SAMN06484418	SAMN06484420	SAMN06484213	SAMN09949096	SAMN06484293	SAMN06484373	SAMN06484413	SAMN06484072	SAMN06484073	SAMN06484074	SAMN06484414	SAMN08622972	SAMN05437226	SAMN0537225	SAMN0537224	SAMN06484164	SAMN06849331	SAMN09949097	SAMN06483920	SAMN06483955
Accession no.	MWZN00000000	MWZP00000000	MWZQ00000000	MWZS00000000	MWZU00000000	QYYU00000000	MWZX00000000	MWZY00000000	MXAA00000000	MXAB00000000	MXAC00000000	MXAD00000000	MWZM00000000	PVEW00000000	MCBB00000000	MCBA00000000	MCAZ00000000	MXAI00000000	NETC00000000	QYYV00000000	MWZJ00000000	MWZL00000000
