# Supplementary material for: Environmental and Clinical Strains of Vibrio cholerae Non-O1, Non-O139 From Germany Possess Similar Virulence Gene Profiles
Source: Front Microbiol. 2019 Apr 12;10:733. doi: 10.3389/fmicb.2019.00733 (PMC6474259; doi:10.3389/fmicb.2019.00733)
Supplement: Supplementary file 10 [file Table_10.xlsx]

## Sheet: SNP distance matrix
	VN-00168	VN-00297	VN-00298	VN-00300	VN-00307	VN-00459	VN-00461	VN-00462	VN-00470	VN-00471	VN-00472	VN-00473	VN-00533	VN-00534	VN-02808	VN-02825	VN-02923	VN-05176	VN-10012	VN-10133	VN-10143	VN-10191
VN-00168	0	19971	19545	27992	19974	28024	6913	20516	4657	20488	20373	19533	18400	22261	26634	26610	26633	20478	28535	22764	28166	28175
VN-00297	19971	0	11361	27306	3	27481	20293	10125	19523	10089	9870	3127	12702	23355	25809	25805	25808	10210	27993	23501	27802	27805
VN-00298	19545	11361	0	27090	11360	27322	19696	12812	18947	12792	12589	10326	11360	23295	25917	25904	25916	12841	27846	23568	27593	27598
VN-00300	27992	27306	27090	0	27305	30063	28238	27424	27991	27428	27428	27159	25373	28489	30067	30046	30066	27422	11892	28622	27222	27229
VN-00307	19974	3	11360	27305	0	27480	20294	10126	19526	10090	9873	3128	12701	23356	25810	25806	25809	10211	27992	23502	27801	27804
VN-00459	28024	27481	27322	30063	27480	0	28171	27455	27970	27456	27370	27315	25623	28535	30106	30064	30105	27470	30618	28652	30073	30080
VN-00461	6913	20293	19696	28238	20294	28171	0	20815	5635	20799	20677	19982	18577	22731	26835	26830	26834	20782	28766	23096	28470	28479
VN-00462	20516	10125	12812	27424	10126	27455	20815	0	20075	58	776	8439	13443	23742	26206	26199	26205	179	28181	23500	27646	27650
VN-00470	4657	19523	18947	27991	19526	27970	5635	20075	0	20039	19930	19064	17849	22385	26532	26527	26531	20029	28564	22865	28082	28091
VN-00471	20488	10089	12792	27428	10090	27456	20799	58	20039	0	726	8405	13423	23721	26193	26186	26192	129	28185	23485	27688	27692
VN-00472	20373	9870	12589	27428	9873	27370	20677	776	19930	726	0	8190	13248	23773	26160	26129	26159	847	28145	23535	27694	27698
VN-00473	19533	3127	10326	27159	3128	27315	19982	8439	19064	8405	8190	0	11824	23263	25685	25677	25684	8524	27901	23391	27508	27511
VN-00533	18400	12702	11360	25373	12701	25623	18577	13443	17849	13423	13248	11824	0	22121	24139	24128	24138	13455	26076	21957	25705	25710
VN-00534	22261	23355	23295	28489	23356	28535	22731	23742	22385	23721	23773	23263	22121	0	26946	26924	26945	23646	29304	12711	28535	28544
VN-02808	26634	25809	25917	30067	25810	30106	26835	26206	26532	26193	26160	25685	24139	26946	0	724	1	26178	30647	27383	30238	30243
VN-02825	26610	25805	25904	30046	25806	30064	26830	26199	26527	26186	26129	25677	24128	26924	724	0	723	26171	30644	27332	30200	30205
VN-02923	26633	25808	25916	30066	25809	30105	26834	26205	26531	26192	26159	25684	24138	26945	1	723	0	26177	30646	27382	30237	30242
VN-05176	20478	10210	12841	27422	10211	27470	20782	179	20029	129	847	8524	13455	23646	26178	26171	26177	0	28179	23437	27695	27699
VN-10012	28535	27993	27846	11892	27992	30618	28766	28181	28564	28185	28145	27901	26076	29304	30647	30644	30646	28179	0	29340	28055	28064
VN-10133	22764	23501	23568	28622	23502	28652	23096	23500	22865	23485	23535	23391	21957	12711	27383	27332	27382	23437	29340	0	28862	28867
VN-10143	28166	27802	27593	27222	27801	30073	28470	27646	28082	27688	27694	27508	25705	28535	30238	30200	30237	27695	28055	28862	0	43
VN-10191	28175	27805	27598	27229	27804	30080	28479	27650	28091	27692	27698	27511	25710	28544	30243	30205	30242	27699	28064	28867	43	0
	0 - 500	500-5000	5000-10000	10000-17500	17500-25000	>25000
